# Supplementary material
Source: Springer Nature journal article supplement (https://www.springermedizin.de/resource/supplementary/12876_2010_556_MOESM2_ESM.pdf/9437248)

**A**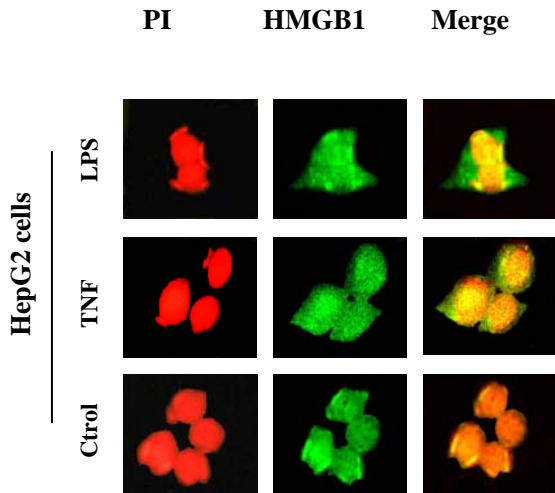**B**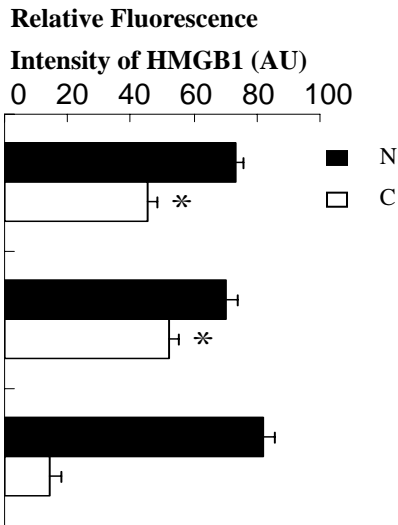**C**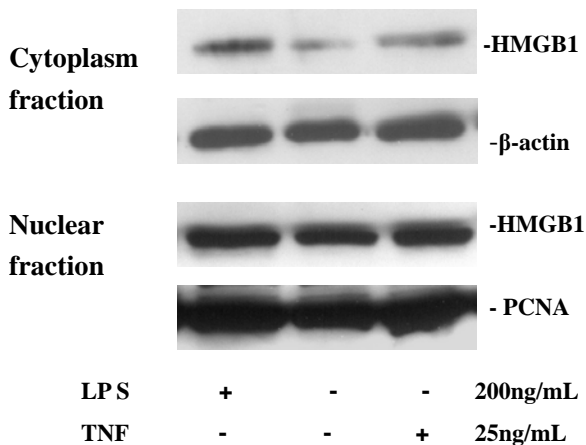

Supplement: MOESM2 [file 9437248]
